# Supplementary material
Source: ML conference proceedings conference paper supplement (https://openreview.net/forum?id=hW0tcXOJas2)
Supplement: supplementary_material [file attachment]

# 1 Supplementary

2 In the supplementary, we include some visualization results and details about how the communication volume is calculated.  
3

## 4 1.1 Visualization

5 In Figure 1 and 2 we visualize some examples from the test set, including the ground truth multi-view  
6 observed scene, the completed scene and the results on detection and segmentation respectively. In  
7 addition, we also visualize a few examples together with the difference between the true observation  
8 and the completed scene in Figure 3 to give a clearer look at the completion quality.

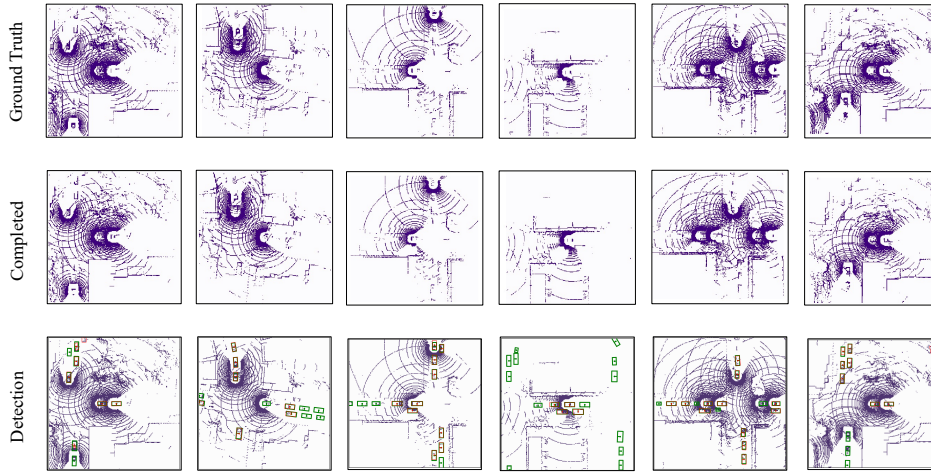

Figure 1: **Visualization: completion and detection.** 6 randomly sampled examples in the test set are visualized above. Rows from top to bottom are respectively: the ground truth multi-view scene, the completed scene predicted and the detection results given by the detection model based on the completed scene.

## 9 1.2 Communication Volume

10 In this work, we measure bandwidth to compare the communication volume required by different  
11 methods. Here we present the details of how it is calculated. In a nutshell, the robots communicate  
12 with intermediate representations, so to measure the bandwidth is to measure the size of the interme-  
13 diate features being transmitted per second between robots. Specifically, if the intermediate feature  
14 has size  $h \times w \times c$  and the model transmit  $p\%$  following the time amortized approach, then the *byte*  
15 *size* of the data being transmitted per sample will be:  $8 \times p\% \times h \times w \times c$  since each element of the  
16 feature is 8-byte floating point number. This can be generalized to other data types as well. Then  
17 assume the robot observe and communicate at a frequency of  $f$  ( $f = 5\text{Hz}$  for the V2X-Sim dataset),  
18 the communication bandwidth  $V_c$  is computed as:

$$V_c = f \times 8 \times p\% \times h \times w \times c \quad \text{Byte/s} \quad (1)$$

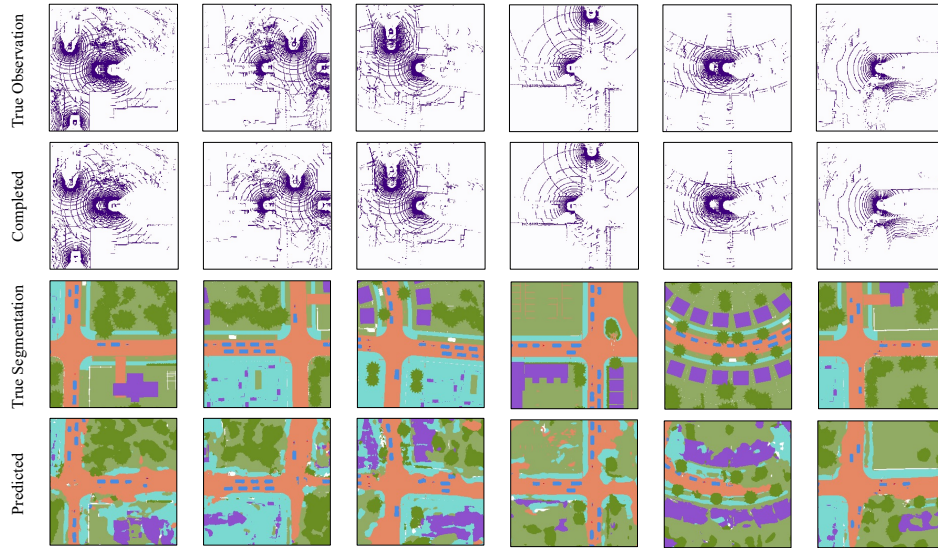

Figure 2: **Visualization: completion and segmentation.** 6 randomly sampled examples in the test set are visualized above. Rows from top to bottom are respectively: the ground truth multi-view scene, the completed scene, the ground truth semantic segmentation and the predicted results based on the completed scene.

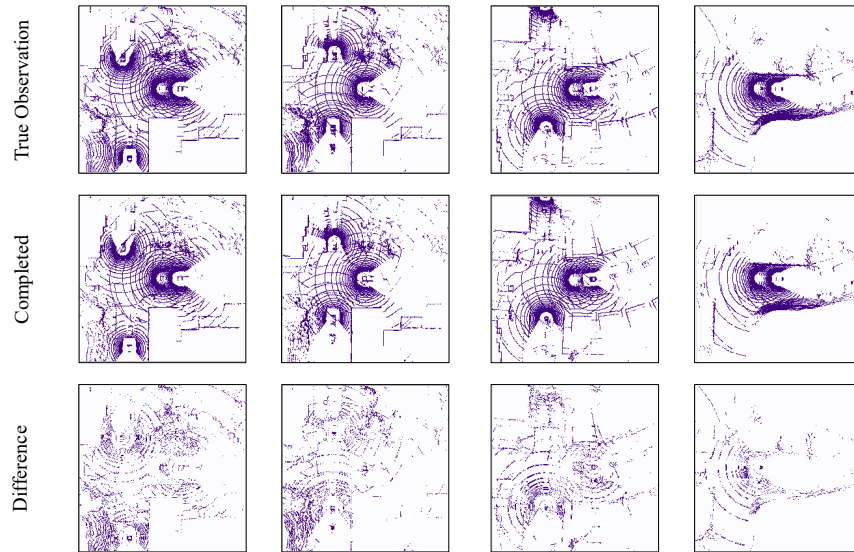

Figure 3: **Visualization: completion quality.** The first two rows are the true observation and the completed scene, and the last row shows the difference between them.
